# Supplementary material
Source: Springer Nature journal article supplement (https://www.springermedizin.de/resource/supplementary/13048_2012_94_MOESM2_ESM.pdf/9664882)

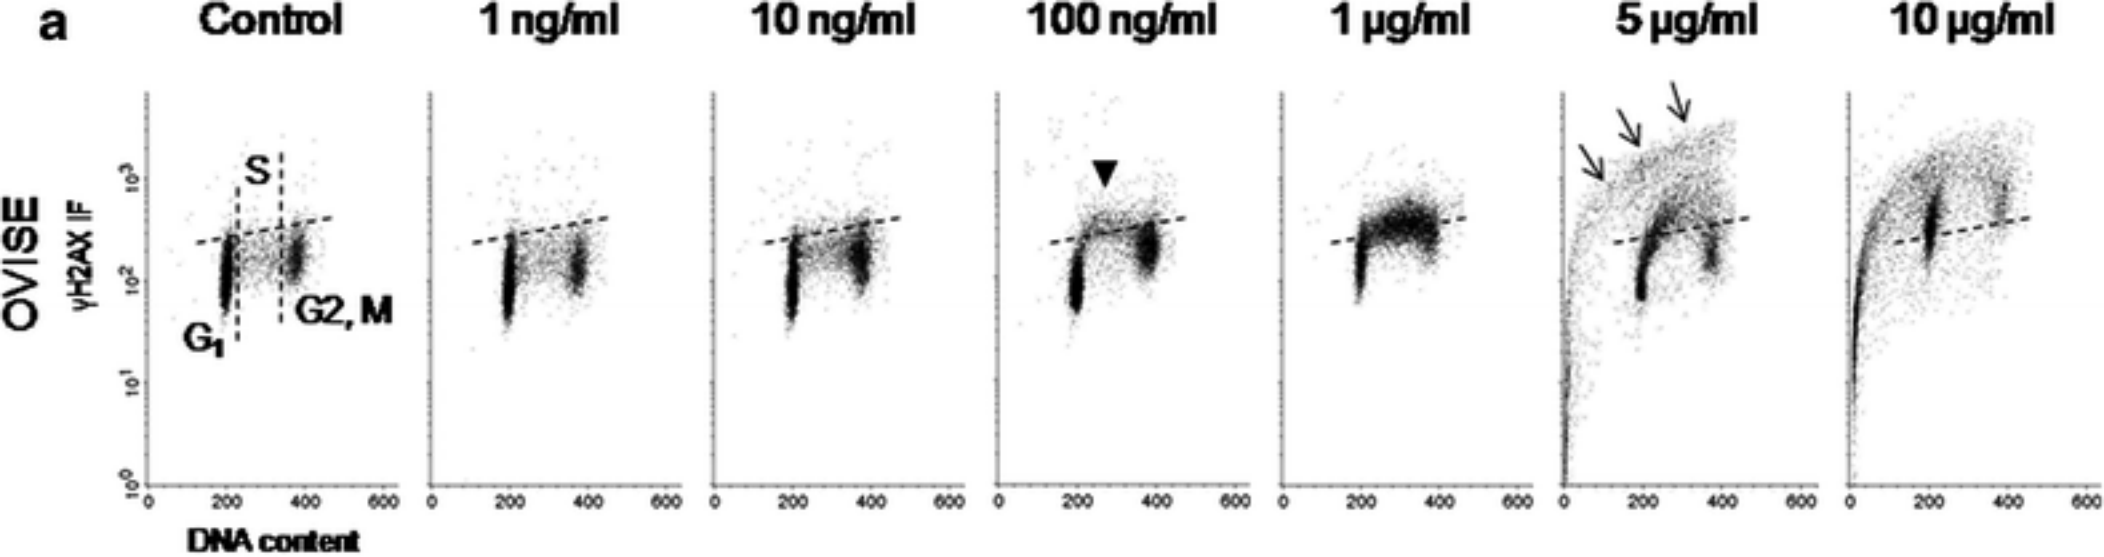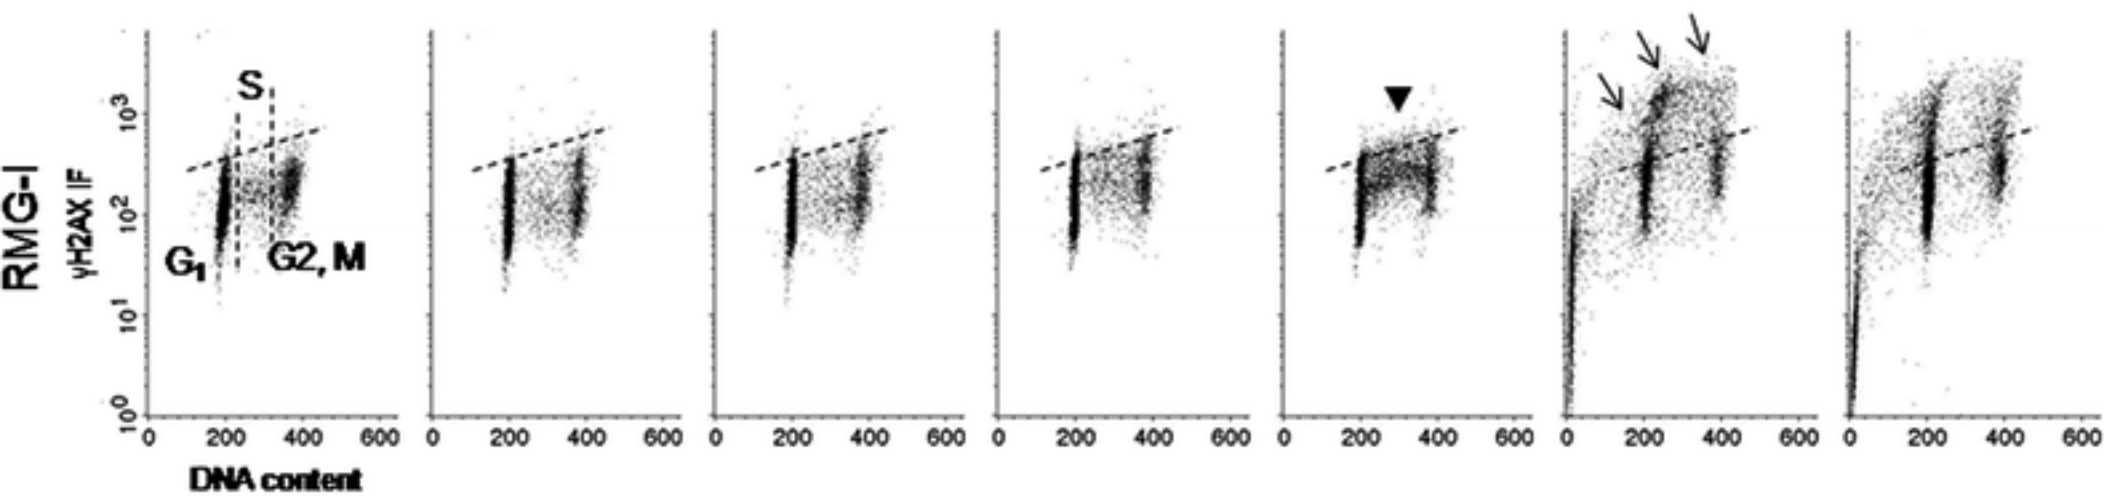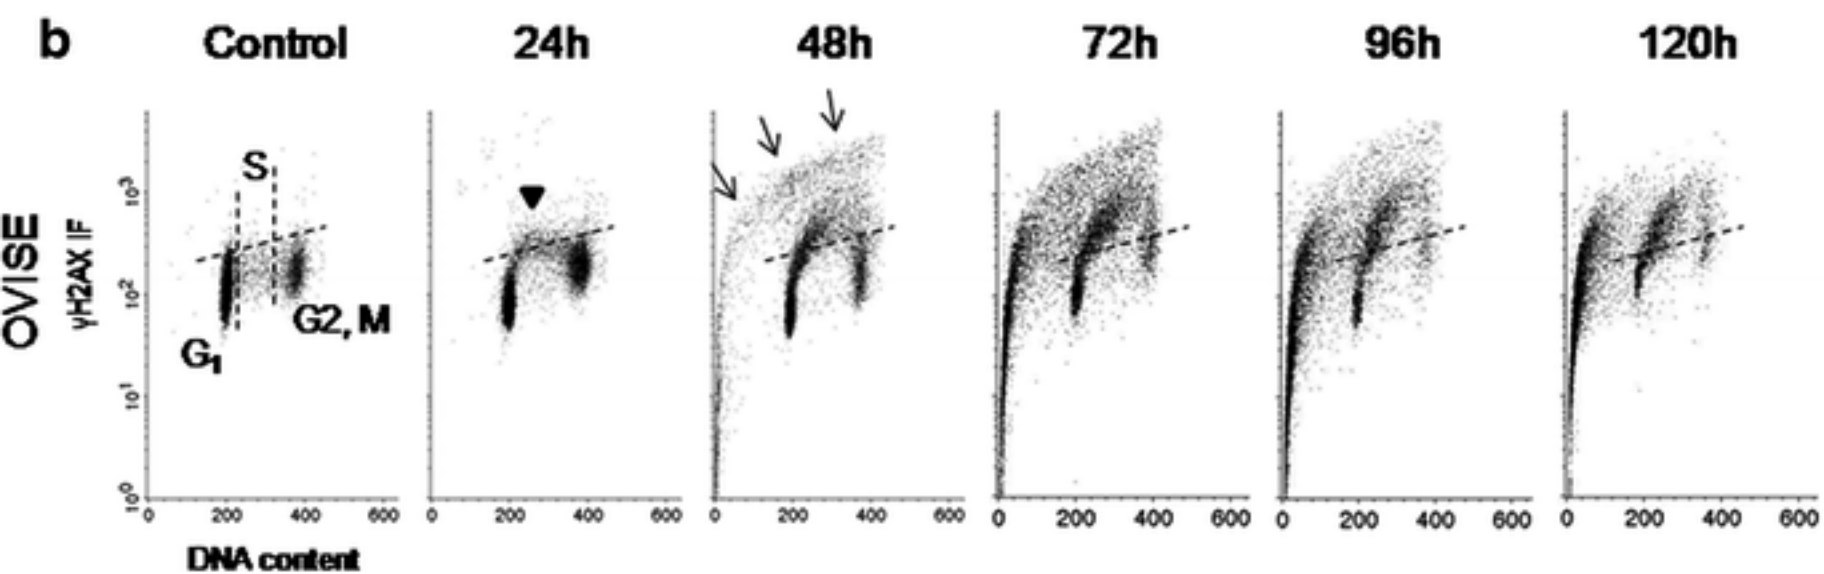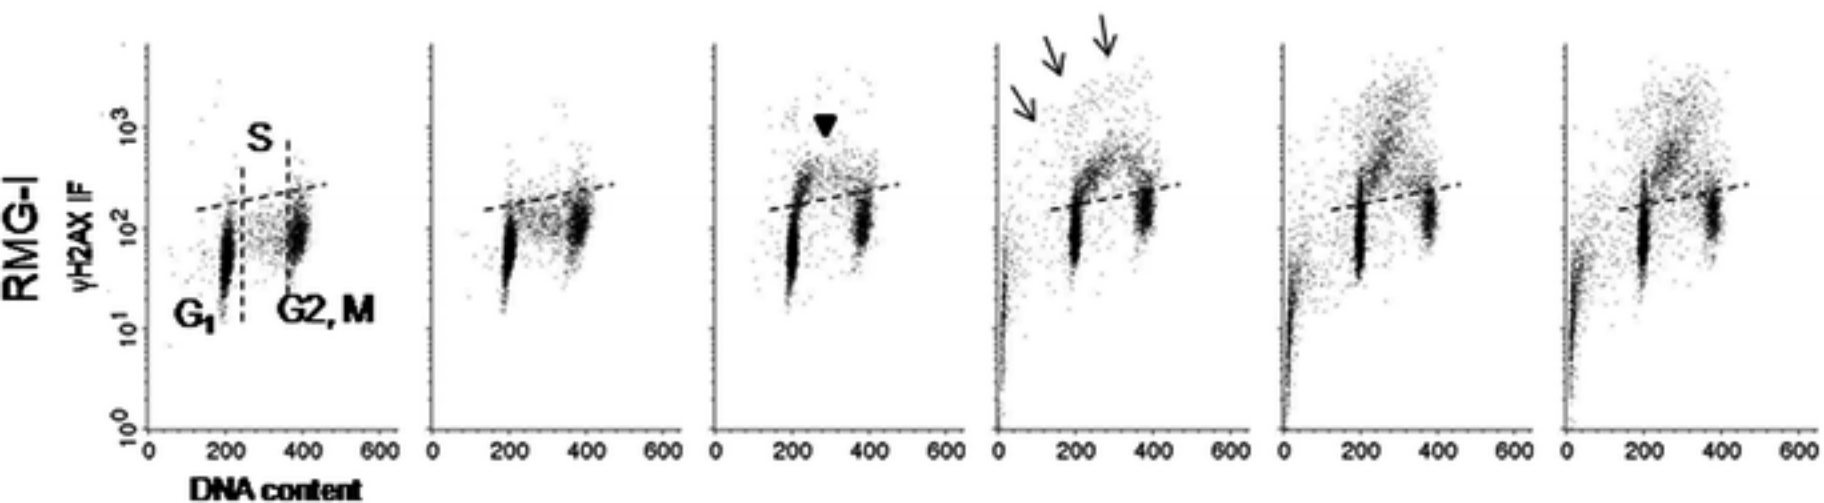

Supplement: MOESM2 [file 9664882]
